# Supplementary material for: Ocean alkalinity enhancement using sodium carbonate salts does not impact Fe dynamics in a mesocosm experiment
Source: Copernicus journal article supplement (doi:10.5194/egusphere-2023-2868), 2023-12-11

**Reviewer 1**

**RC1: 'Comment on egusphere-2023-2868', Anonymous Referee #1, 18 Jan 2024 reply**

**This study by González-Santana et al. attempts to assess the impact that the addition of sodium carbonate and sodium bicarbonate minerals to seawater mesocosms has on iron dynamics. The study presents new measurements of the different iron species over the course of the addition of alkalinity into the mesocosms. Unfortunately, the mesocosms do not look to have been setup to study this as a specific aim, which leads to several shortcomings in the research. As the authors point out the mesocosms were not carried out following trace-metal requirements, which will have substantially impacted their data. In general, the data itself looks very noisy, with no trends that would be statistically significant within the given dataset. Given the limitations in the field data, the authors could have conducted laboratory experiments or even simple biochemical modelling to compare with the data to see whether we would even expect to see any changes in the data given the limited impact that these alkalinity additions have on seawater chemistry.**

**The other major issue that I have with the study is that one of the conclusions is that the iron size fractions and phytoplankton are independent. This is clearly the case as this is not an iron-limited environment. If this study had been conducted in an iron-limited environment, then the results might have been very different.**

**While I am not opposed to publishing a null result (which I believe these to be), the authors could have compared the results to laboratory data or a biochemical model which would greatly strengthen this work.**

Dear reviewer,

We completely agree with the fact that these experiments were not carried out following trace metal procedures in iron limited environments. Those conditions would probably have led to different results where iron additions in iron limited conditions could affect primary productivity and the evolution of the mesocosms. However, our goal was to observe what happened with the iron in coastal mesocosms experiments in an environment where coastal marine Carbon Dioxide Removal techniques have been proposed.

We did not look into the use of biochemical models to explain the possible results as surface waters present significant Fe(II) concentrations which we currently cannot account with our theoretical equations and Fe(II) oxidation kinetics constant equations. We think that the use of a biogeochemical model could lead to a second article where the model is the center of the manuscript, and it tries to explain the results within the noise observed in our data.

**11: OAE should be Ocean Alkalinity Enhancement. (Not alkalization; alkalization enhancement does not make sense).**

Done

**15: replace levels with additions.**

Done

**17: add a capital delta symbol before 2400.**

Done

**20: delete “could” and “because of”.**

Done

**21: add “due to” before OAE.**

Done

**32: OAE should be Ocean Alkalinity Enhancement. (Not alkalization; alkalization enhancement does not make sense). Replace “both produce” with “lead to”.**

Done

**37: replace “might have” with “has” and “consequences in” with “consequences for”.**

Done

**38: replace “heightening” with “increasing”.**

Done

**39: The hydrogen ion concentration is the pH (which you’ve already said increases!).**

Removed

**40: replace “hoisted” with “increased”.**

Done

**45: Where are the proposed mineral dissolution products coming from? Are you suggesting the sediments, or biogenic materials in the water column, or something else entirely? Add “e.g.” before the list of potential minerals as more than these three are used.**

We have added e.g. and added the references: Renforth and Henderson, 2017; Hartmann et al., 2013; Bach et al., 2019.

**46: “necessary” not “necessitated”.**

Done

**47: “technique under” not “technique at”.**

Done

**49: Replace “factor” with “variable of interest”.**

Done

**64: delete “time”.**

Done

**65: delete “the” before photooxidation and decreasing.**

Done

**66: delete “in the”.**

Done

**67: rephrase to “All of these factors can induce...”**

Done

**71: “colloidal size fraction...”**

Done

**75: replace “a significant higher” with “significantly higher”.**

Done

**78: replace “by OAE” with “for OAE”.**

Done

**82: The mass of Ca or Mg required to impact the amount of Mg and Ca in seawater makes this a negligible impact (~2.5 mM DIC, ~10 mM Ca, ~50 mM Mg). No one is proposing the scale of OAE that would impact Ca and Mg concentrations enough to impact iron.**

**87: Again, think about the mass balance and consider how much alkalinity enhancement you would have to do before impacting the concentrations of Ca and Mg! Even in these experiments with a doubling of the alkalinity (which is extreme!) this would only impact Ca by ~25% and Mg by ~5%.**

Answer to L82 and L87.

We agree that the added Ca and Mg would not drastically change their relative concentration since they are major ions in seawater. However, in Santana-Casiano et al., (2010) they showed that the combined effect of calcium/magnesium in seawater with changes in pH could have an effect on Fe-organic compound interactions and speciation. Therefore, if there is an initial salt which should be considered first in mesocosms experiments it should be a Na salt due to its lower impact in the iron cycle. However, more research should be performed considering how these salts affect iron interactions before performing large scale experiments.

**89: “preceptive” is not what you mean here?**

We have changed the word to “recommended”.

**90: Stick to what you have done in this paragraph and simplify.**

We have reworded the whole paragraph and simplified it to: “The aim of this research was to study the evolution of inorganic and organic Fe speciation in seawater under OAE scenarios. We considered if the added material acted as a significant iron source, and its effects on both the iron size fractionation and Fe-binding ligand evolution.”

**92: delete “previously”.**

Done

**93: replace “used alkalization methodology” with “added material” and “which” with “what”.**

Done

**111: add capital delta symbol before 2400.**

Done

**118: replace “Subsequently, 0.2 um filtered samples followed on” with “Aliquots were filtered (0.2 uM Sartobran™ PES) for sFe, dFe and LFe.”.**

Done

**120: delete the bracket after sampling and add “for” after “dark”.**

Done

**121: replace “to” with “at”.**

Done

**141: Define “TAC” here.**

We have changed as stated in comment L150.

**142: Do you mean +0 Fe additions?**

We have modified the sentence to: “starting with two no Fe additions followed by more than 10 titration points (Gledhill and Buck, 2012; Garnier et al., 2004).”

**150: Use this definition of TAC above, not here.**

Done

**163: Add a space before units (do this throughout the paper, it is currently inconsistent).**

We have gone through the manuscript and found two more cases.

**194: Superscript “-1”.**

Done and checked other “-1” superscripts.

**196: I don’t think this is significant given the noise in the rest of the data.**

**218: I don’t think the data conclusively shows that the cFe concentration was directly impacted by the addition of the sodium carbonates given the noise in the dataset.**

Answer to comments in L196 and L218

Given the noise and average concentrations through the experiment, it does not initially seem significant. However, all the analysed samples converge towards a similar concentration, and it is what we wanted to indicate.

**211: % not ‰.**

Following GEOTRACES cookbook, we acidify our samples to 2‰ v/v HCl (pH ~2.0). We have modified the sentence to specify this.

**213: This sentence is unfinished.**

This was a sentence that was left here when we moved it to a different section of the manuscript in our pre-submission version. We have eliminated this sentence.

**216: replace “due to its” with “as it is”.**

Done

**217: replace “uptake” with “to uptake”.**

Done

**236: This is unsurprising given that these experiments were conducted in an environment where iron is not limiting!**

**255: replace “previous to” with “before”.**

Done

**258: replace “concerning D1500” with “in the D1500 mesocosm”.**

Done

**263: replace “computed” with “calculated to be”.**

Done

**269: The values in this paragraph don’t seem that similar. Be clearer and specifically compare values.**

We have modified the paragraph and added “The pumping of more coastal water to fill the mesocosms could explain the observed increase in concentrations.”

**273: superscript “-1”.**

Done

**277: “being the weaker ligands the most abundant” does not make sense.**

We have modified the sentence to “being weaker ligands ( $L_2$ ) more abundant than stronger ligands ( $L_1$ )”

**282: remove “a” before “biological”.**

Done

**288: replace “from” with “of”.**

Done

**300: rephrase to “biological parameters. This suggest the alkalinity addition in the mesocosm experiments did not...”.**

Done

**310: The sentence starting with “Where the...” needs to be rephrased.**

We have combined and modified this sentence with the previous one: “This could have been a result of the manipulation required to fill in mesocosms in the open environment, where the iron sources such as sediment resuspension, aerial input and water runoffs are combined with our mesocosm manipulation.”

**312: “concentration” not “concentrations”.**

Done

**313: I still don’t think this has been shown.**

**We have modified the sentence to:** “Nevertheless, the addition of sodium carbonate salts ( $\text{NaHCO}_3$  and  $\text{Na}_2\text{CO}_3$ ) coincided with a decreases in the dFe concentration just after the addition. ”

**315: “change” instead of “present changes”.**

Done

**316: “were added” not “addition” and “may” instead of “will shortly”.**

We have changed the sentence to “The results suggest that the added sodium carbonate salts may...”

**318: This paragraph is discussion not conclusion as it is not related to what you did in these experiments.**

We agree with the reviewer and have moved the paragraph to the end of the discussion.

**327: delete “obtained”.**

Done

**328: delete “i.e., did not alter the Fe cycle,” as it is just a repetition.**

Done

**329: replace “was” with “were”.**

Done

**330: delete “extensions” and reword the following two sentences.**

We deleted the word extension and modified the last two sentences to “However, it's important to consider that while employing this Oceanic Iron Fertilization (OAE) technique in coastal waters might not significantly impact the iron cycle, outcomes could differ under varying conditions. For instance, if the experiment were conducted in oligotrophic open ocean waters, the presence of a bloom exceeding those observed in these experiments could lead to different results. Conversely, an excess of iron might inhibit phytoplankton growth due to potential toxic effects. Therefore, further research into the effects of Carbon Dioxide Removal (CDR) techniques on trace metals is essential to mitigate unintended consequences on the ecosystem.”

**Figures 2 and 3: Both figures need error bars.**

We have added the error bars to the figures, see some examples below. We do not see an improvement in the information presented. In most cases the errors are within the symbol size. The increase in the number of lines is making it a bit excessive. We are not against adding error bars. We would like you to confirm that the addition of the error bars provides more pros than cons.

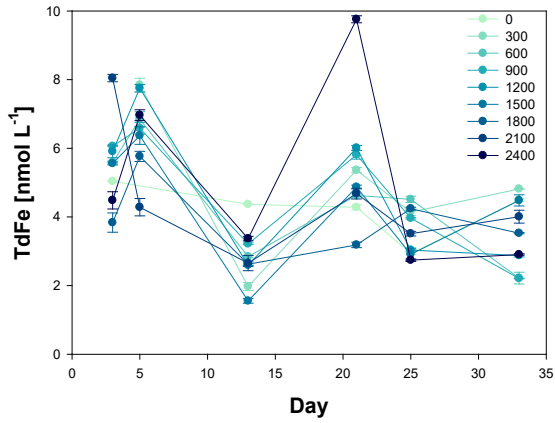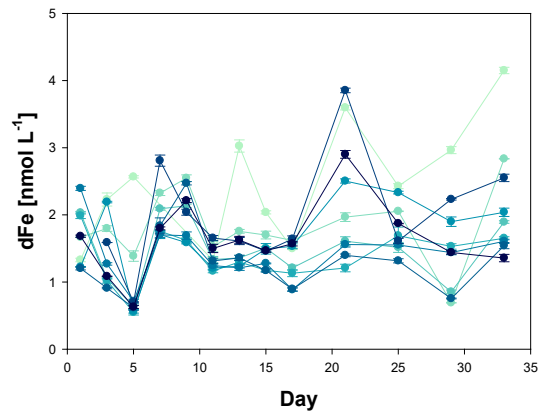

Supplement: Supplementary file [file egusphere-2023-2868-AC1-supplement.pdf]
