# Supplementary material for: Ocean alkalinity enhancement using sodium carbonate salts does not impact Fe dynamics in a mesocosm experiment
Source: Copernicus journal article supplement (doi:10.5194/egusphere-2023-2868), 2023-12-11
Supplement: Supplementary file 1 [file egusphere-2023-2868-supplement.pdf]

## **Supplementary material**

Ocean alkalinity enhancement using sodium carbonate salts does not impact Fe dynamics in a mesocosm experiment

David González-Santana<sup>1</sup>, María Segovia<sup>2</sup>, Melchor González-Dávila<sup>1</sup>, Librada Ramírez<sup>2</sup>, Aridane G. González<sup>1</sup>, Leonardo J. Pozzo<sup>2</sup>, Veronica Arnone<sup>1</sup>, Víctor Vázquez<sup>2</sup>, Ulf Riebesell<sup>3</sup>, J. Magdalena Santana-Casiano<sup>1</sup>.

<sup>1</sup>Instituto de Oceanografía y Cambio Global, IOCAG, Universidad de Las Palmas de Gran Canaria, ULPGC, Spain.

<sup>2</sup>Department of Ecology, Faculty of Sciences, University of Malaga, Málaga, Spain.

<sup>3</sup>GEOMAR Helmholtz Centre for Ocean Research Kiel, Kiel, Germany.

\*Corresponding author: david.gonzalez@fpct.ulpgc.es

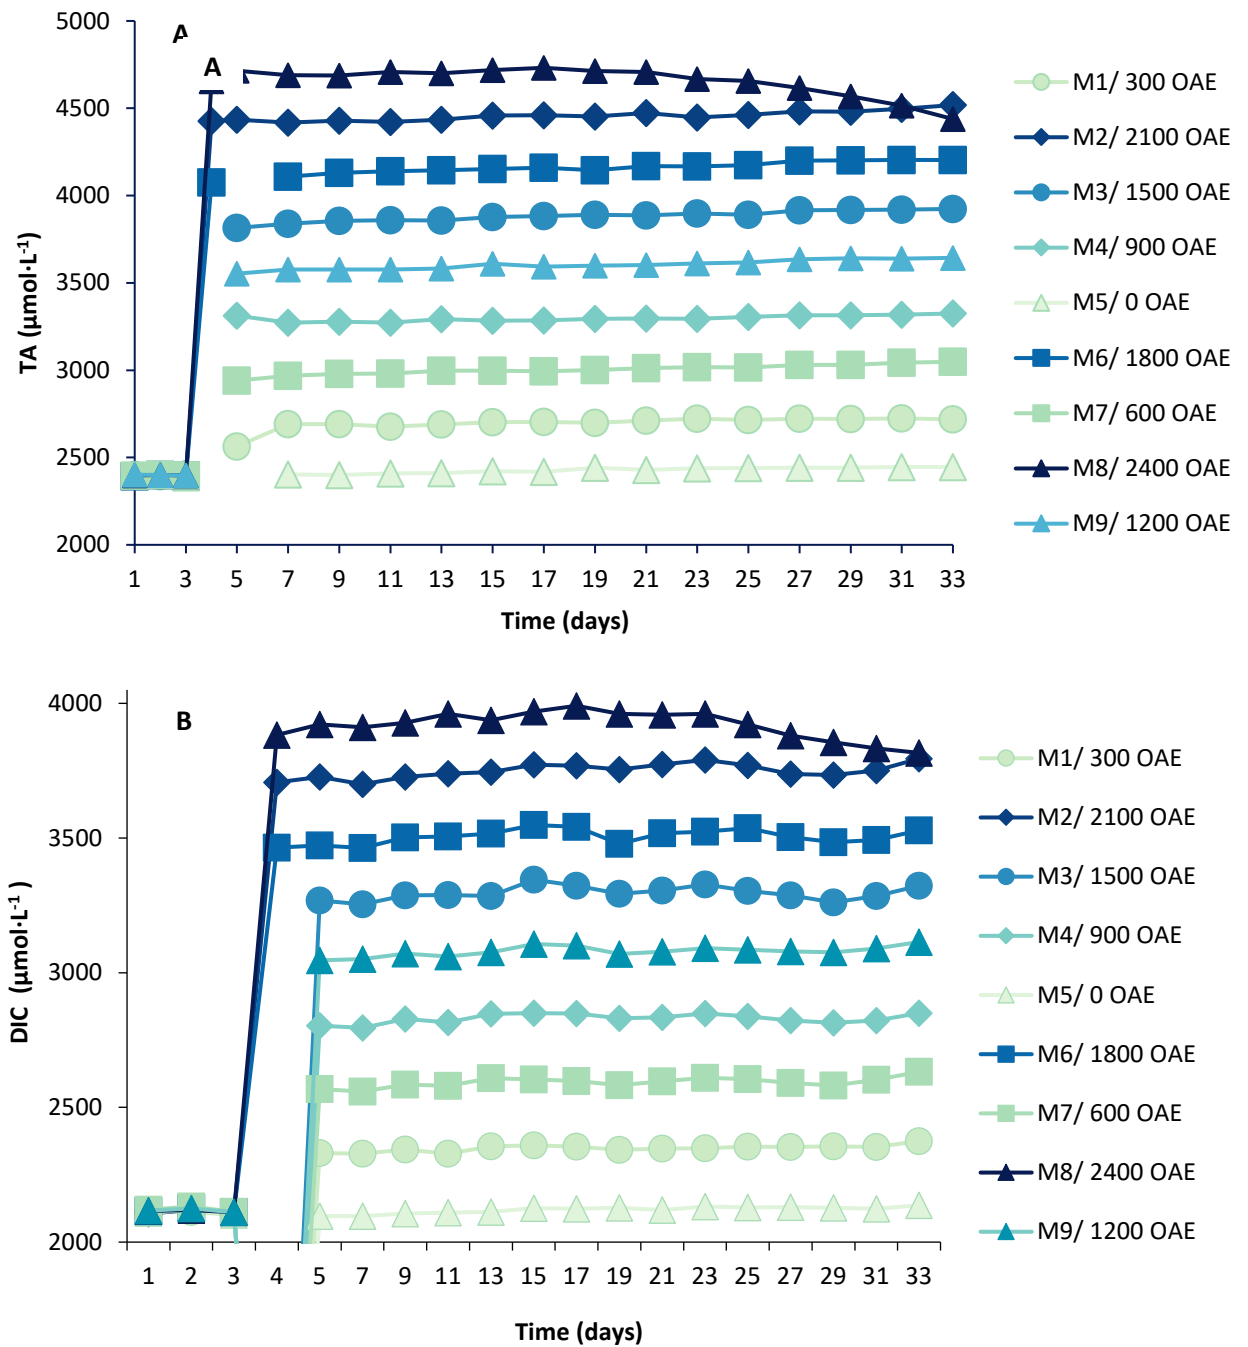

**Figure S1.** A) Evolution of total alkalinity (TA) ( $\mu\text{mol}\cdot\text{L}^{-1}$ ); and B) dissolved inorganic carbon (DIC) ( $\mu\text{mol}\cdot\text{L}^{-1}$ ) over time during the mesocosms experiment. **Reproduction with permission of *Biogeosciences*, Marin-Samper et al. Year, issue, vol, pages.**

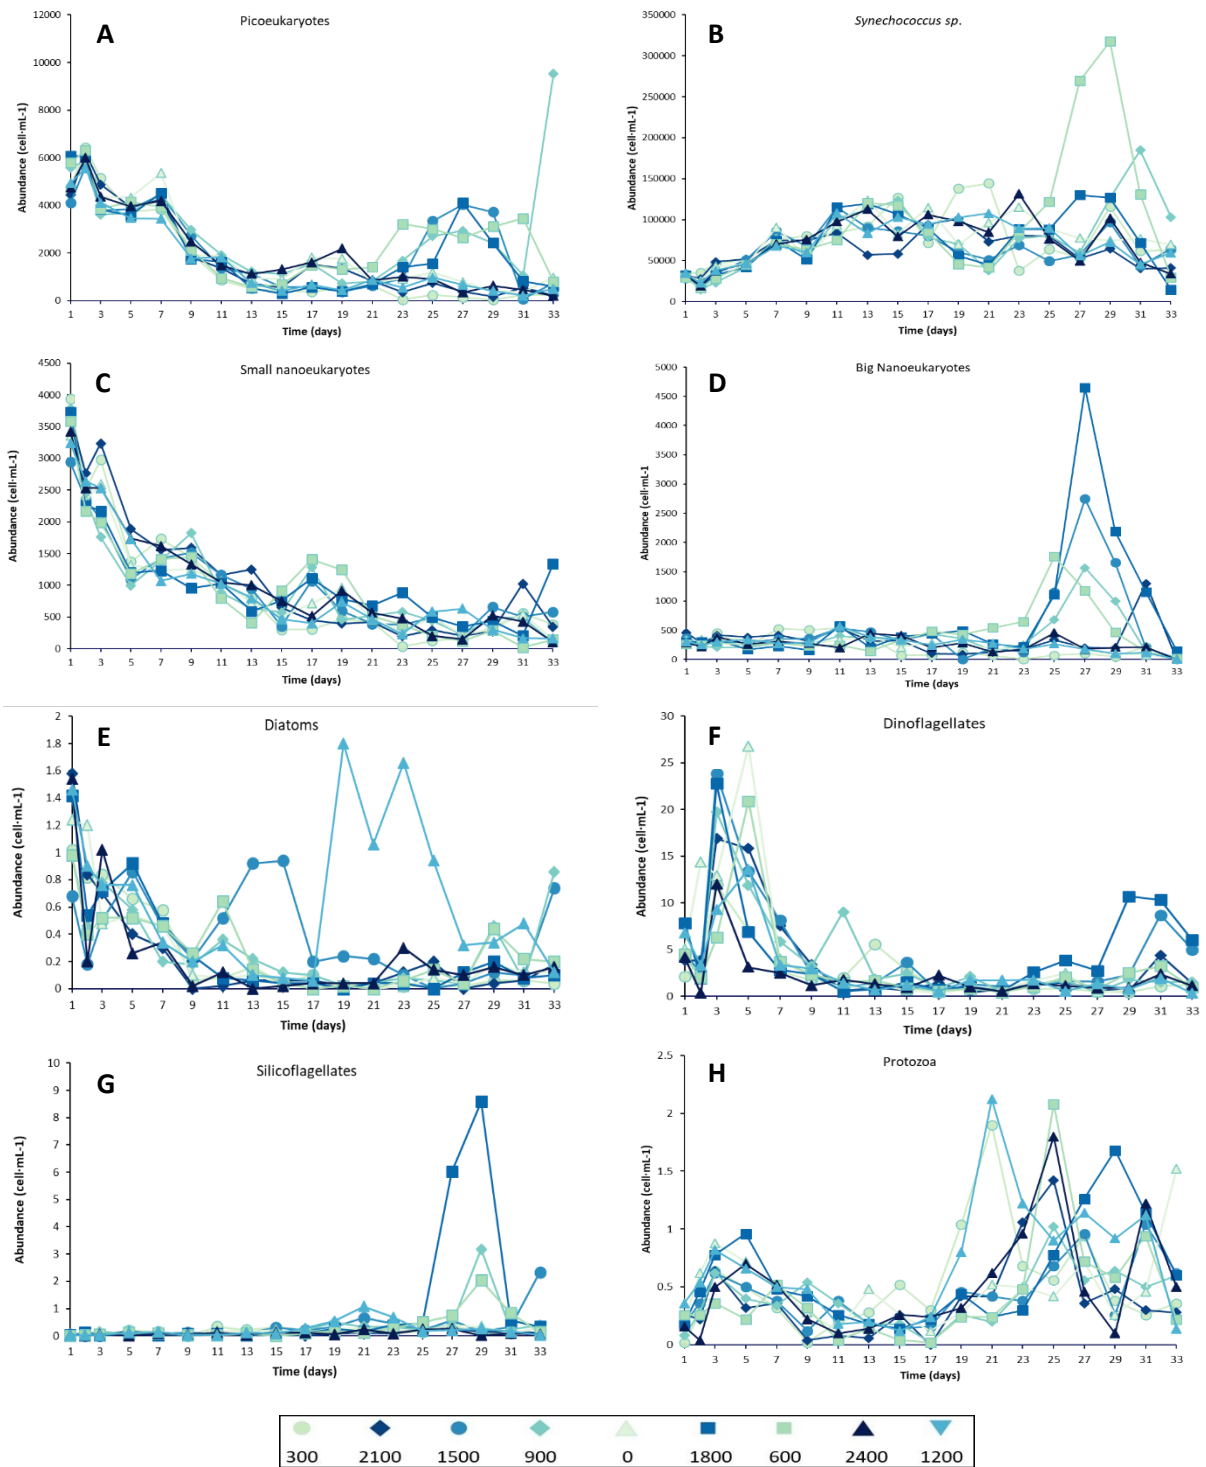

**Figure S2.** Cell abundance of phyto- and microphytoplankton in cell·ml<sup>-1</sup>. A) Picoeukaryotes <2  $\mu\text{m}$ ; B) *Synechococcus* spp. < 2  $\mu\text{m}$ ; C) Small nanoeukaryotes 2-20  $\mu\text{m}$ ; D) Large nanoeukaryotes >20  $\mu\text{m}$ ; E) Diatoms; F) Dinoflagellates; G) Silicoflagellates; H) Protozoa. **Reproduction in with permission of *Biogeosciences*, Marin-Samper et al. A-D and Ramirez et al. for E-H. Year, issue, vol, pages.**
